# Supplementary material
Source: PubMed Central journal article supplement (PMC6682451)

## Supplementary Online Content

Gyamfi-Bannerman C, Zupancic JAF, Sandoval G, et al; Eunice Kennedy Shriver National Institute of Child Health and Human Development Maternal-Fetal Medicine Units Network. Cost-effectiveness of antenatal corticosteroid therapy vs no therapy in women at risk of late preterm delivery: a secondary analysis of a randomized clinical trial. *JAMA Pediatr*. Published online March 11, 2019.  
doi:10.1001/jamapediatrics.2019.0032

**eFigure 1.** Decision Tree

**eFigure 2.** Incremental costs, effectiveness, and associated sampling uncertainty

**eFigure 3.** Difference in total cost by change in cost of betamethasone

**eTable.** Sensitivity Analyses Varying the Cost of Betamethasone and All Other Health Care Costs

This supplementary material has been provided by the authors to give readers additional information about their work.

**eTable 1. Sensitivity Analyses Varying the Cost of Betamethasone and All Other Health Care Costs**

| Parameter                       | Mean Total Cost<br>Betamethasone<br>(n=1,426) | Mean<br>Total Cost<br>Placebo<br>(n=1,395) | ΔCost | ΔEffectiveness | ICER    | %<br>Dominated | %<br>Dominant |
|---------------------------------|-----------------------------------------------|--------------------------------------------|-------|----------------|---------|----------------|---------------|
| <b>Betamethasone cost, base</b> |                                               |                                            |       |                |         |                |               |
| All Costs, 50%                  | 2,364                                         | 2,690                                      | -325  | 0.029          | -11,185 | 0.04           | 98.6          |
| All Costs, base                 | 4,681                                         | 5,379                                      | -698  | 0.029          | -23,986 | 0.04           | 98.8          |
| All Costs, 200%                 | 9,316                                         | 10,759                                     | -1443 | 0.029          | -49,588 | 0.02           | 98.8          |
| <b>Betamethasone cost, 125%</b> |                                               |                                            |       |                |         |                |               |
| All Costs, 50%                  | 2,376                                         | 2,690                                      | -314  | 0.029          | -10,781 | 0.04           | 98.3          |
| All Costs, base                 | 4,693                                         | 5,379                                      | -686  | 0.029          | -23,582 | 0.04           | 98.7          |
| All Costs, 200%                 | 9,328                                         | 10,759                                     | -1431 | 0.029          | -49,184 | 0.02           | 98.8          |
| <b>Betamethasone cost, 150%</b> |                                               |                                            |       |                |         |                |               |
| All Costs, 50%                  | 2,388                                         | 2,690                                      | -302  | 0.029          | -10,377 | 0.04           | 98.1          |
| All Costs, base                 | 4,705                                         | 5,379                                      | -674  | 0.029          | -23,178 | 0.04           | 98.7          |
| All Costs, 200%                 | 9,339                                         | 10,759                                     | -1419 | 0.029          | -48,780 | 0.02           | 98.8          |
| <b>Betamethasone cost, 175%</b> |                                               |                                            |       |                |         |                |               |
| All Costs, 50%                  | 2,400                                         | 2,690                                      | -290  | 0.029          | -9,973  | 0.04           | 97.8          |
| All Costs, base                 | 4,717                                         | 5,379                                      | -663  | 0.029          | -22,774 | 0.04           | 98.6          |
| All Costs, 200%                 | 9,351                                         | 10,759                                     | -1407 | 0.029          | -48,376 | 0.04           | 98.8          |
| <b>Betamethasone cost, 200%</b> |                                               |                                            |       |                |         |                |               |
| All Costs, 50%                  | 2,411                                         | 2,690                                      | -278  | 0.029          | -9,569  | 0.06           | 97.5          |
| All Costs, base                 | 4,728                                         | 5,379                                      | -651  | 0.029          | -22,370 | 0.04           | 98.6          |
| All Costs, 200%                 | 9,363                                         | 10,759                                     | -1396 | 0.029          | -47,972 | 0.04           | 98.8          |

All costs include maternal (non-treatment), hospital, physician, and well-baby costs.

**eFigure 1. Decision Tree**

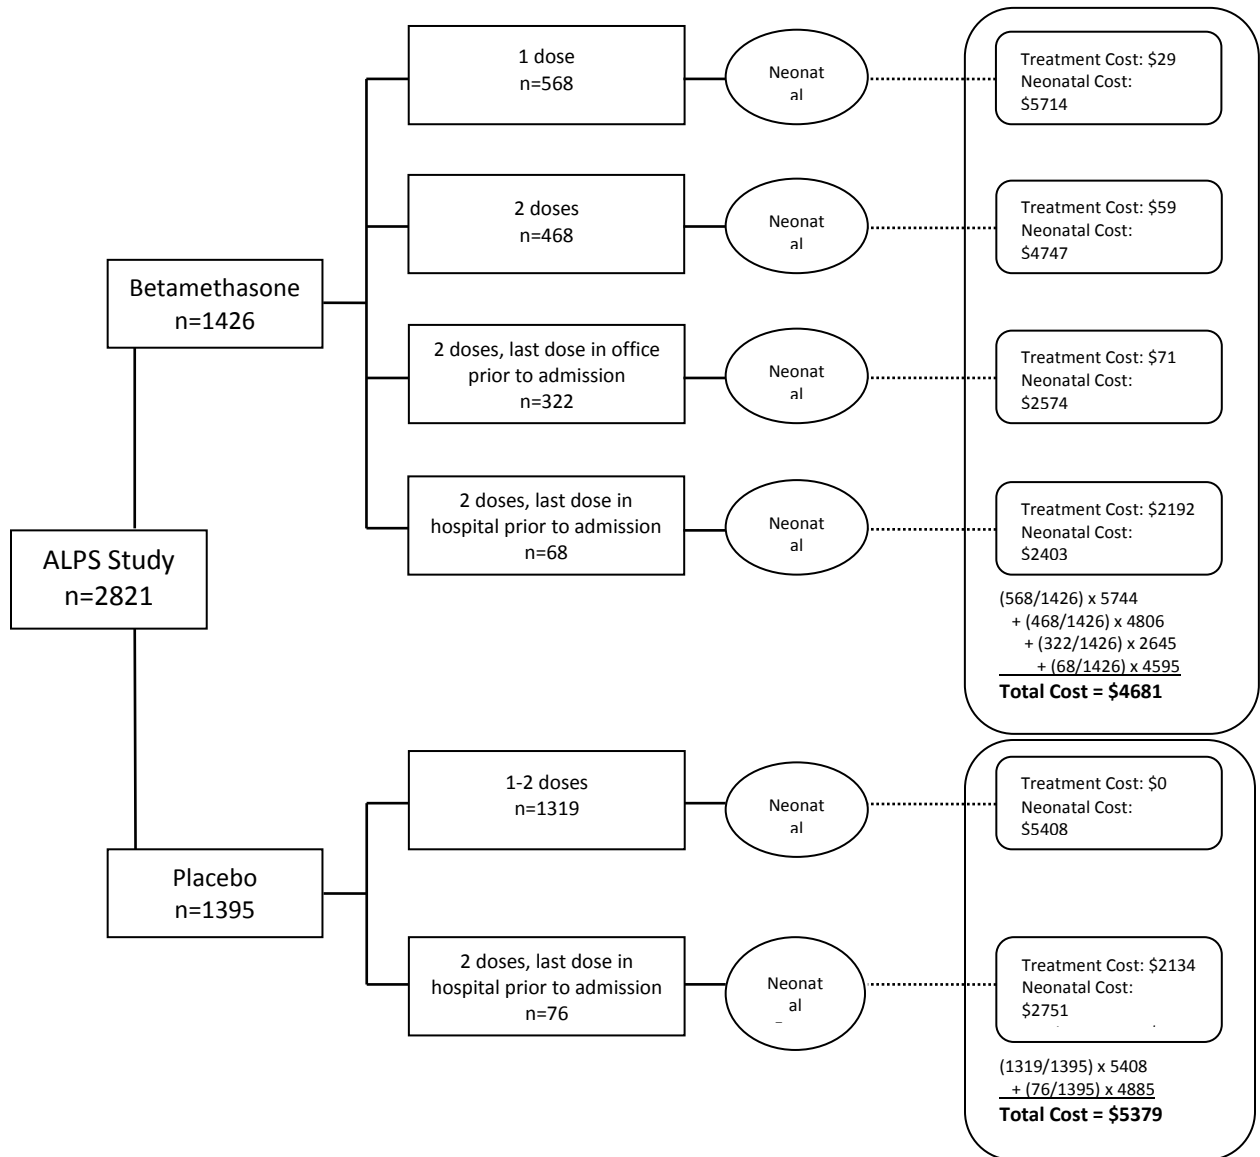

continued eFigure 1

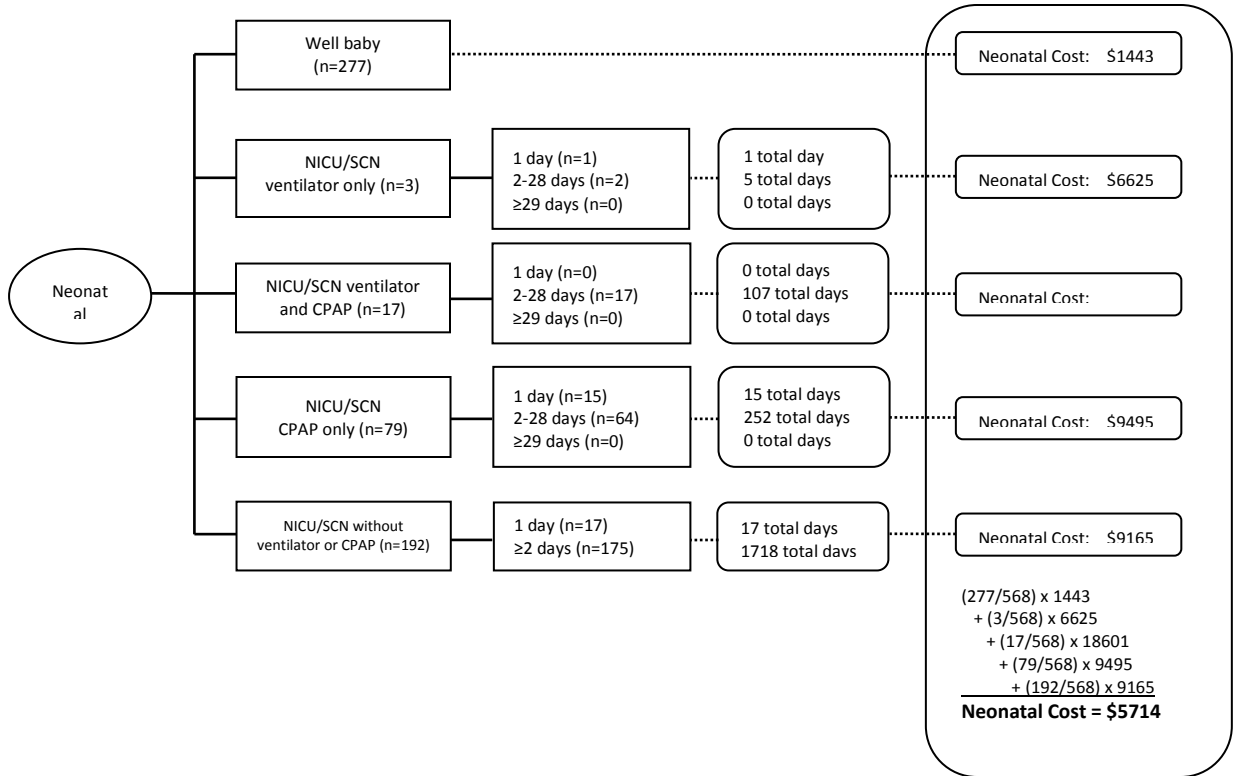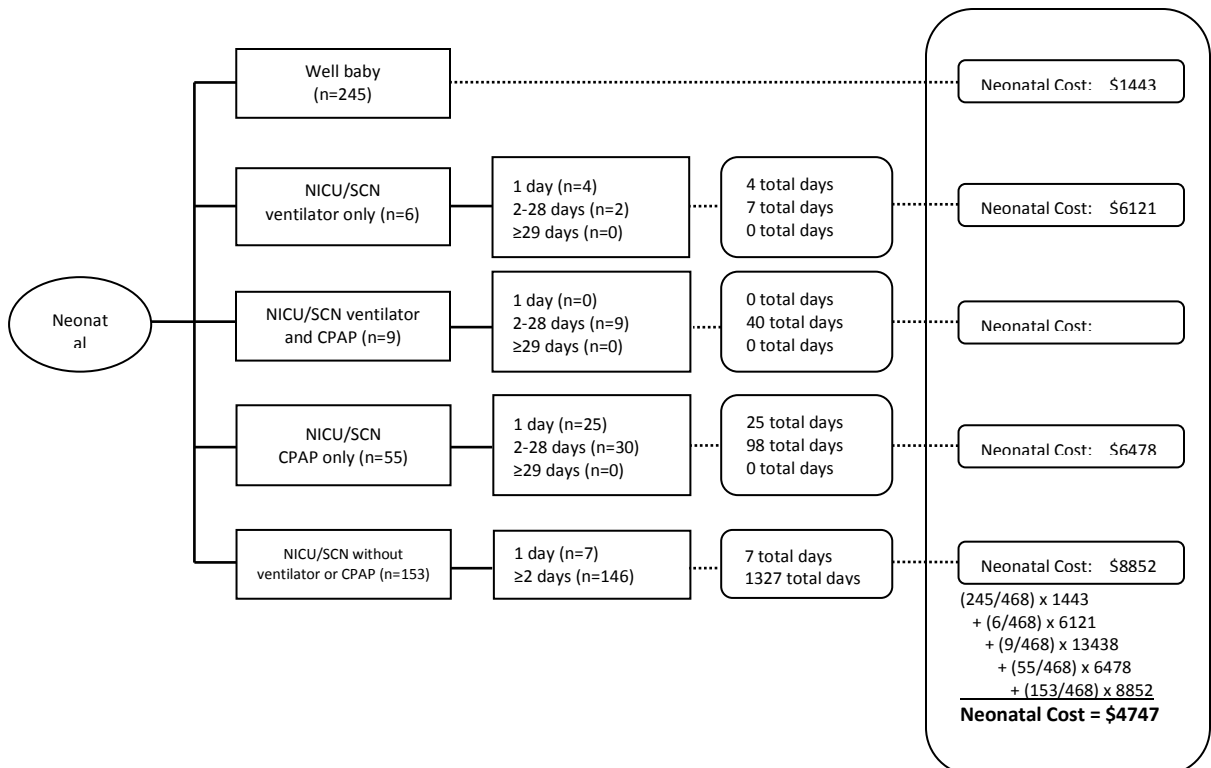

continued eFigure 1

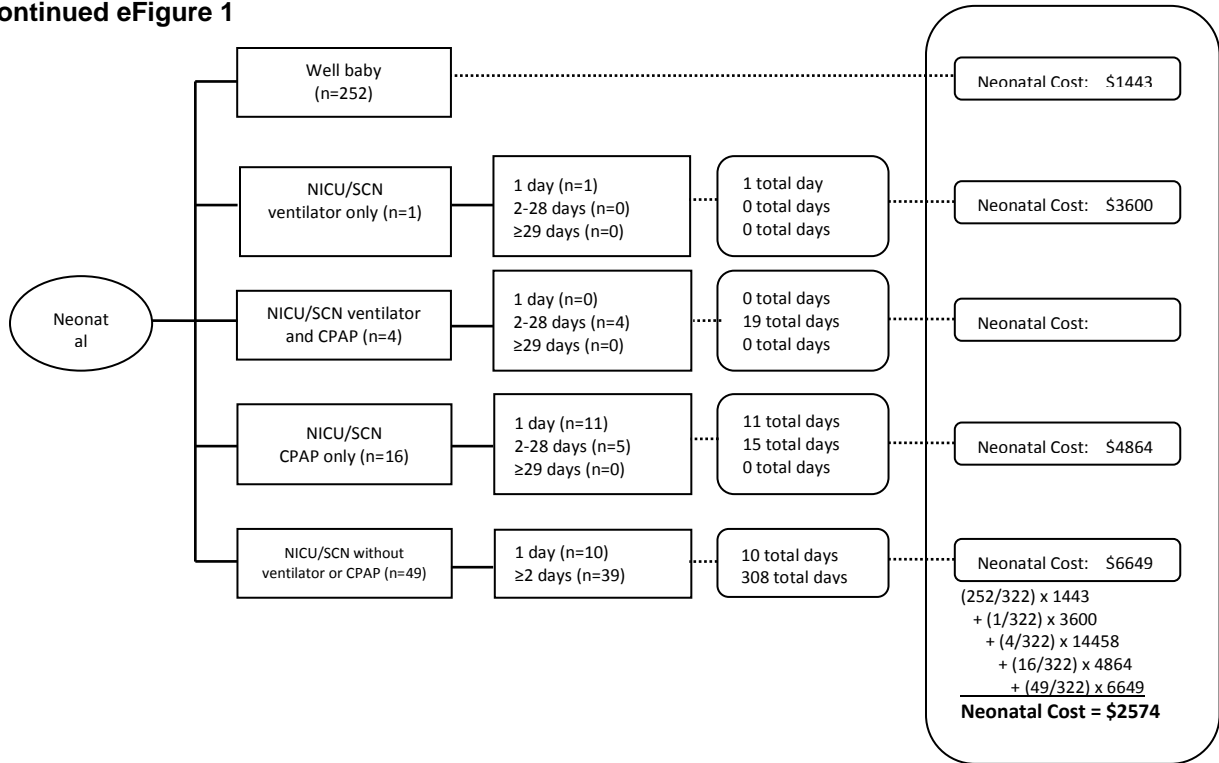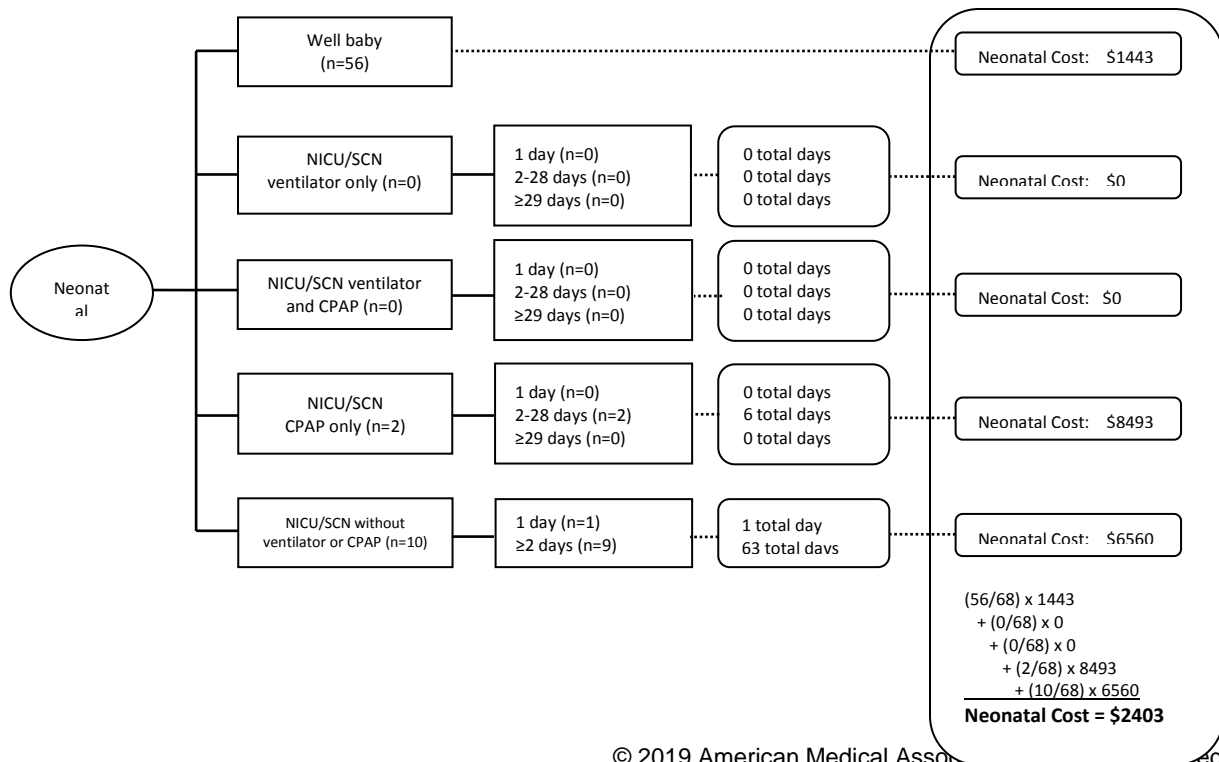

continued eFigure 1

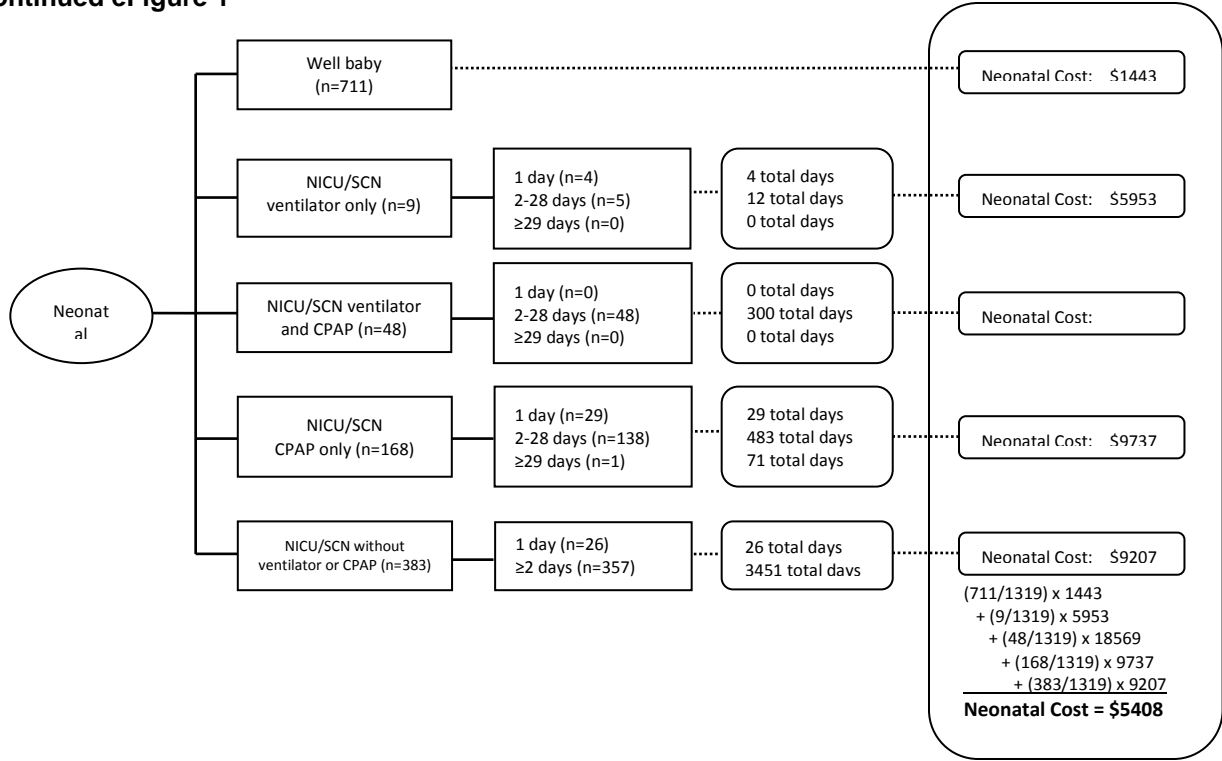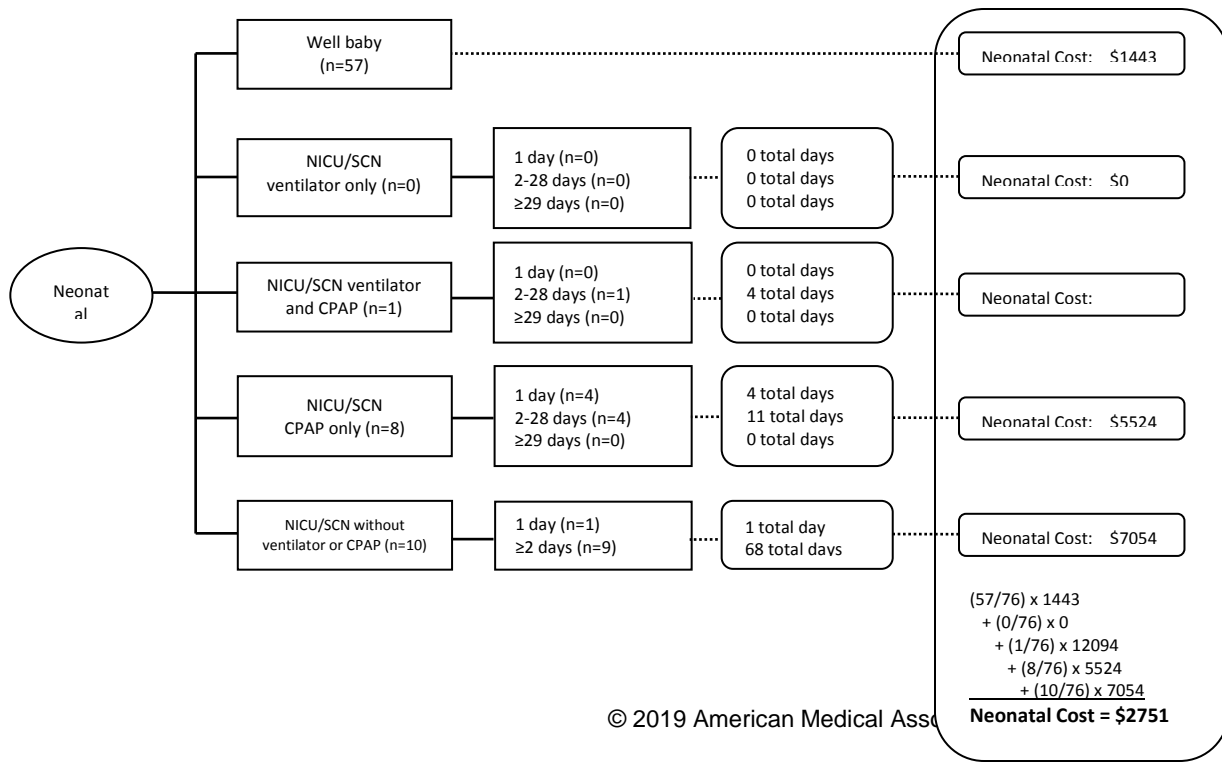

eFigure 2. Incremental costs, effectiveness, and associated sampling uncertainty

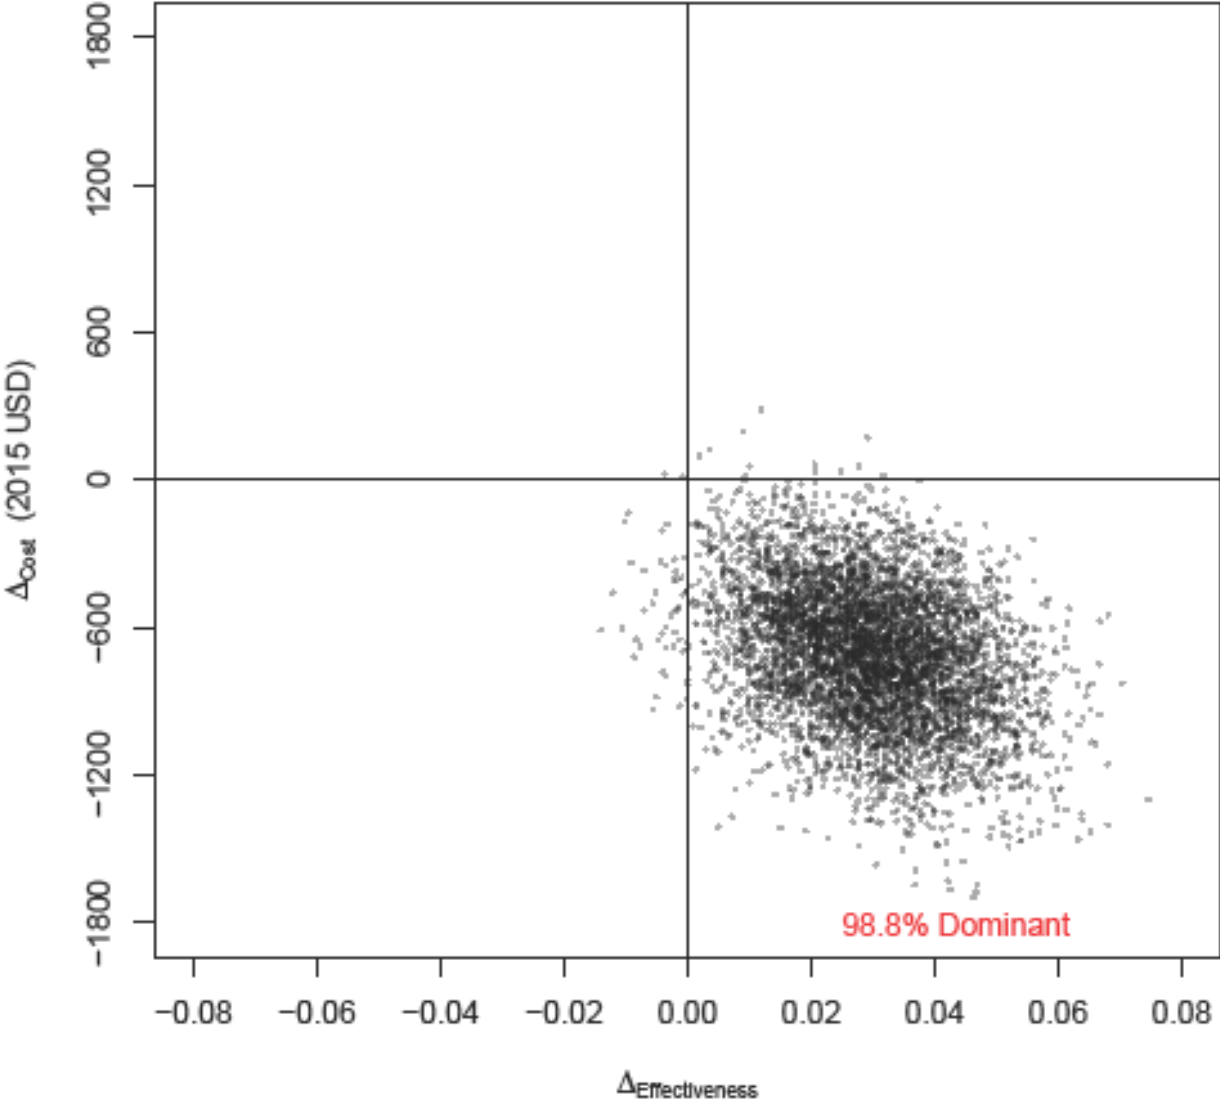

eFigure 3. Difference in total cost by change in cost of betamethasone

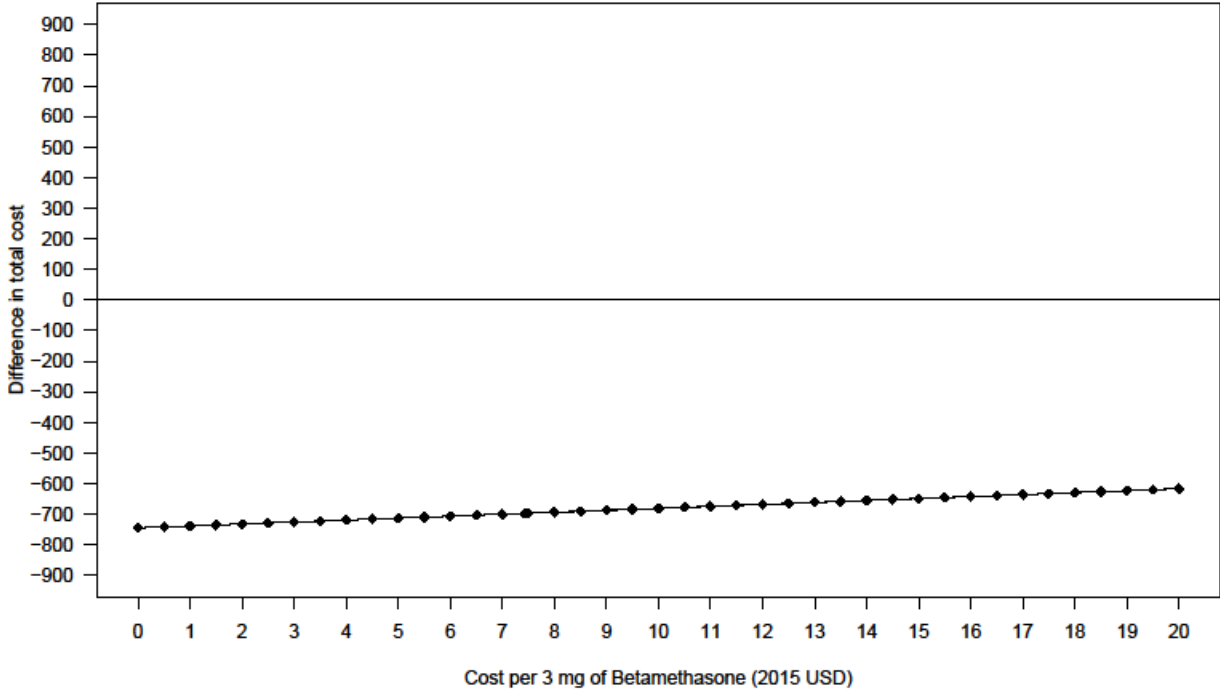

Supplement: NIHMS1017632-supplement-supplement.pdf [file NIHMS1017632-supplement-supplement.pdf]
